# Supplementary material for: Electronic Nose and GC-MS Analysis to Detect Mango Twig Tip Dieback in Mango (<em>Mangifera indica</em>) and Panama Disease (TR4) in Banana (<em>Musa acuminata</em>)
Source: Preprints.org preprint supplement (doi:10.20944/preprints202404.0794.v1), 2024-04-11
Supplement: Supplementary file 1 [file supplementary]

***Supplementary Materials***

Electronic Nose and GC-MS analysis to detect Mango Twig Tip Dieback in mango (*Mangifera indica*) and Panama disease (TR4) in banana (*Musa acuminata*)

Wathsala L. Ratnayake 1, Stanley E. Bellgard 1, Hao Wang 2 and Vinuthaa Murthy 2,*

1. Biosecurity and Animal Welfare Branch, Agriculture, Fisheries and Biosecurity Division, Department of Industry, Tourism and Trade (DITT), Northern Territory Government, Australia

[Wathsala.Ratnayake@nt.gov.au](mailto:Wathsala.Ratnayake@nt.gov.au) (W.L.R.); [Stanley.Bellgard@nt.gov.au](mailto:Stanley.Bellgard@nt.gov.au) (S.E.B.)

1. Chemistry Division, Faculty of Science and Technology, Charles Darwin University, Northern Territory, Australia

[vinuthaa.murthy@cdu.edu.au](mailto:vinuthaa.murthy@cdu.edu.au) (V.M.); [Hao.Wang@cdu.edu.au](mailto:Hao.Wang@cdu.edu.au) (H.W.)

***** Correspondence: vinuthaa.murthy@cdu.edu.au; Tel.: +61 8 89466794


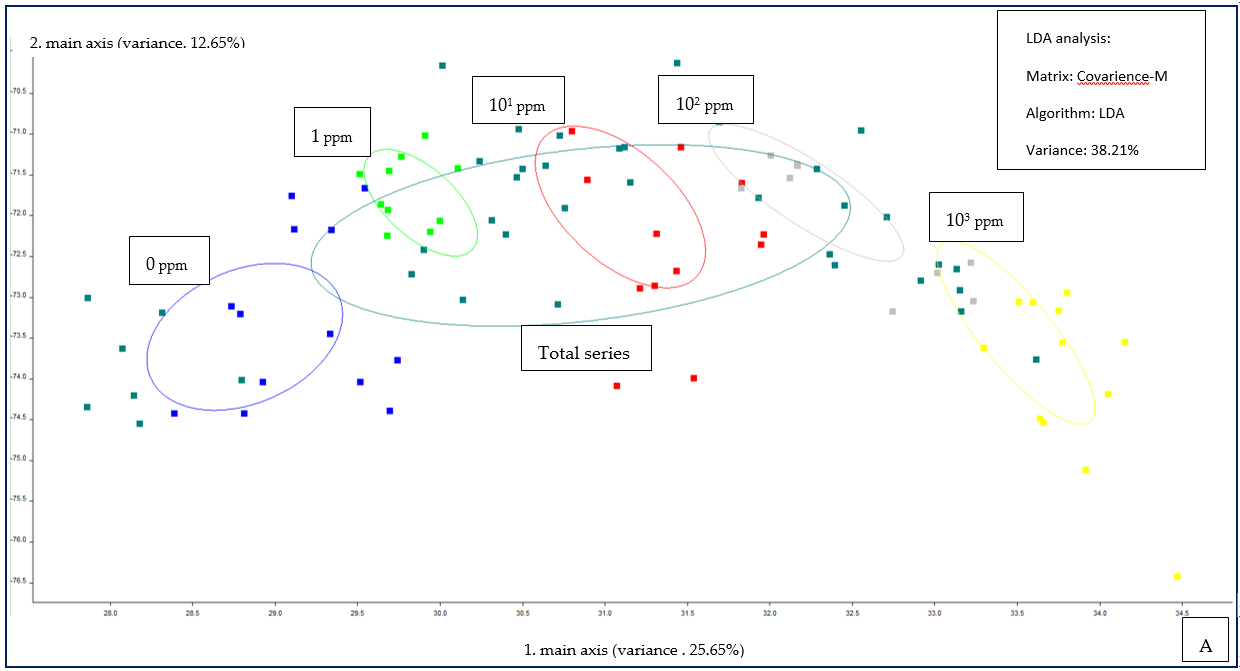


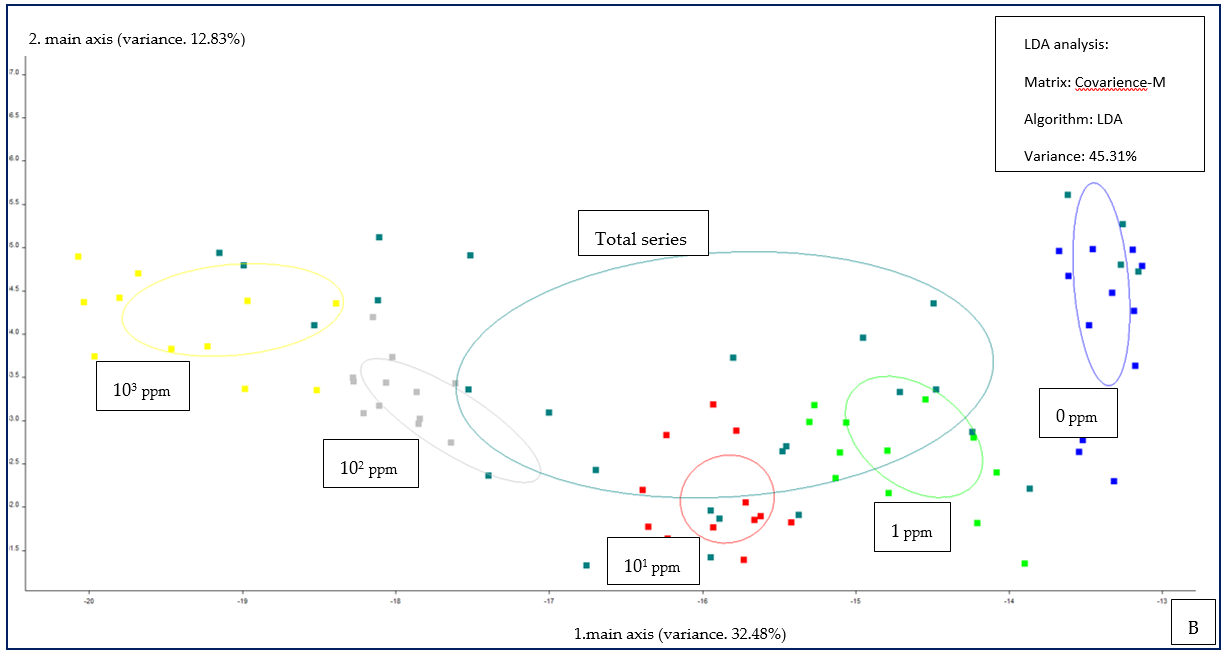


**Figure S1.** Linear Discriminant Analysis plot for individual classes of concentration and total concentration series data obtained from PEN 3 device . (A) 3-Methyl-2-butanol, (B) Isoamyl isovalerate.


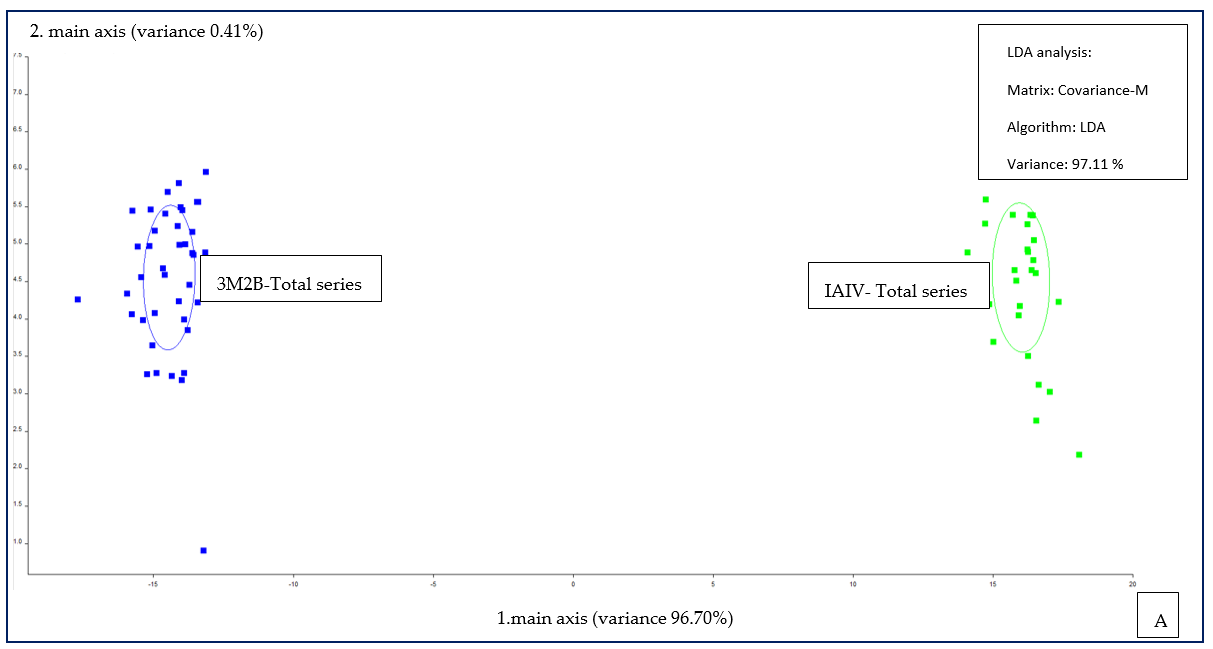


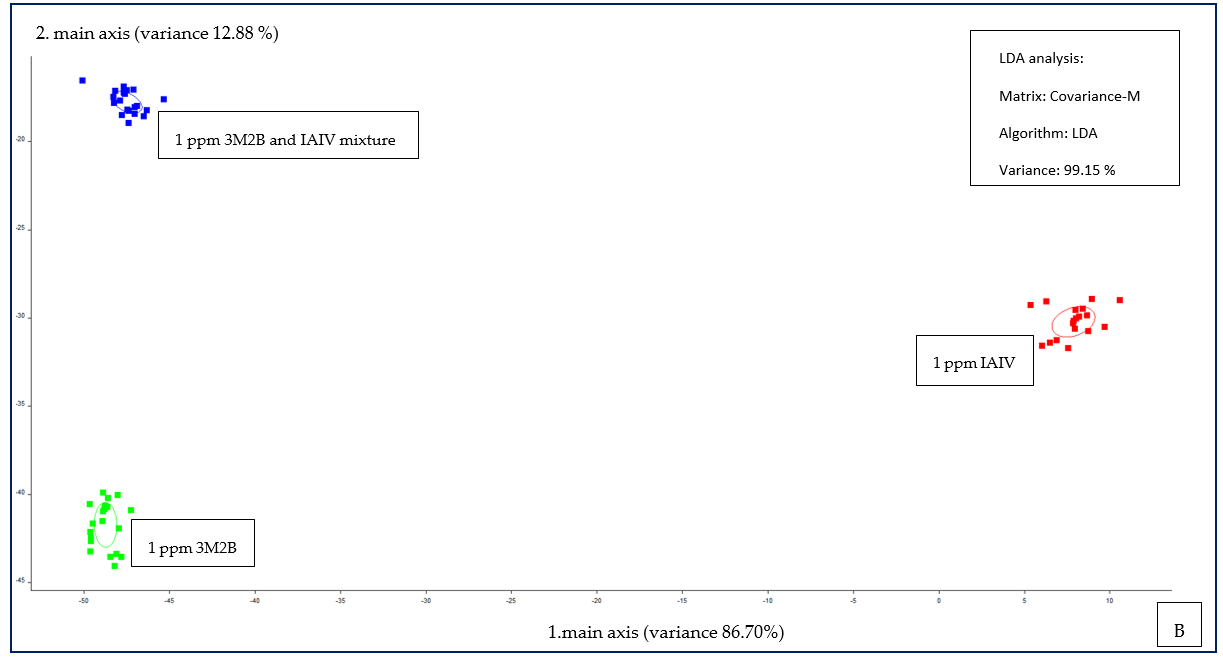


**Figure S2.** Linear Discriminant Analysis Plots of data obtained from the PEN 3 device. (A) 3M2B total series vs IAIV total series, (B) Mixture of 1 ppm 3M2B and IAIV against pure 3M2B and IAIV of 1 ppm.


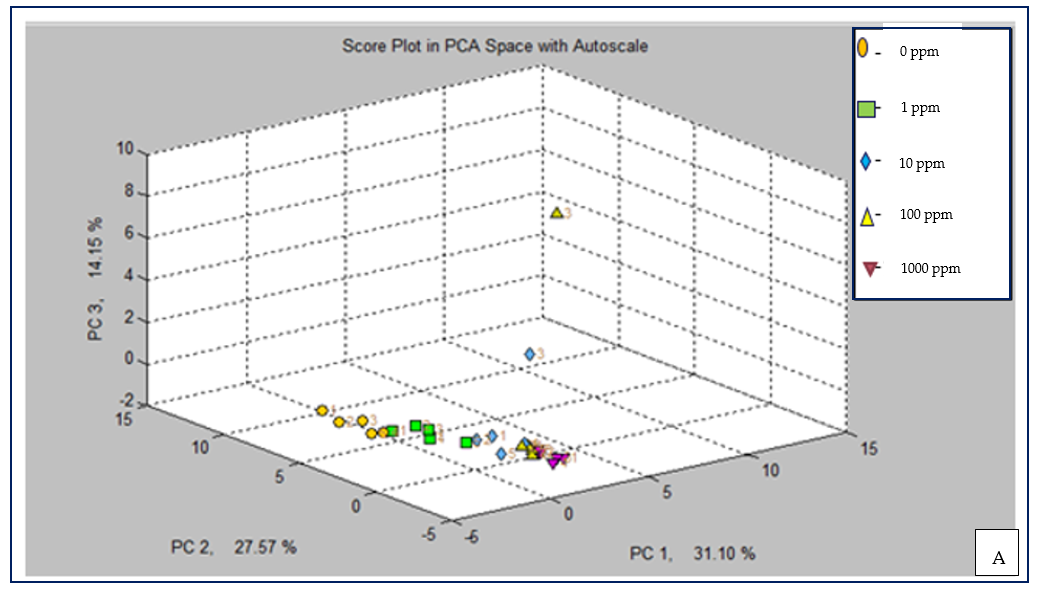


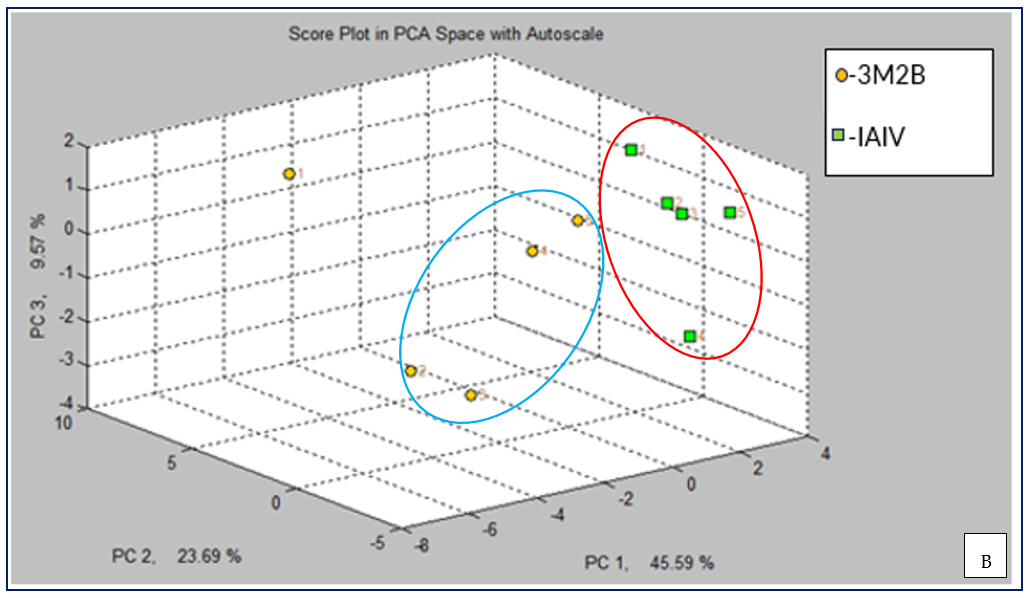


**Figure S3.** CD analysis score plots in PCA of data obtained from MSEM 160 device. (A) 3-Methyl-2-butanol total concentration series, (B) Mixture of 1ppm 3M2B and IAIV.
